# Supplementary material for: Catch fast and kill quickly: do tiger beetles use the same strategies when hunting different types of prey?
Source: PeerJ. 2018 Nov 21;6:e5971. doi: 10.7717/peerj.5971 (PMC6252071; doi:10.7717/peerj.5971)
Supplement: Supplemental Information 1 [file peerj-06-5971-s001.xls]

## Sheet: Arkusz1
	caterpillars						beetles
	small		medium		large		small		medium		large
nb	length (mm)	weight (g)	length (mm)	weight (g)	length (mm)	weight (g)	length (mm)	weight (g)	length (mm)	weight (g)	length (mm)	weight (g)
1	11	30	14	37	19	59	4	2	7	16	9	50
2	11	28	13	49	17	67	5	4	7	21	10	51
3	10	19	14	41	16	82	4	4	8	18	10	44
4	10	24	15	45	16	75	4	4	8	25	10	56
5	11	31	14	53	16	77	4	4	7	8	11	63
6	10	30	13	51	18	69	5	3	8	14	9	51
7	12	27	12	47	17	55	4	2	7	10	10	44
8	11	29	13	43	16	83	5	4	8	12	10	48
9	11	25	14	59	19	69	4	3	8	28	9	40
10	8	40	14	54	16	73	4	5	7	14	10	48
11	12	30	15	39	15	67	4	4	6	10	10	50
12	9	27	13	51	17	71	4	5	7	13	10	64
13	12	34	14	55	16	83	4	4	7	12	9	45
14	12	27	14	45	17	65	4	5	7	16	10	52
15	10	29	14	33	16	89	5	5	8	16	10	51
16	11	29	14	55	18	83	4	4	8	18	10	50
17	9	27	15	36	16	70	4	3	6	10	11	60
18	11	29	13	41	17	89	4	4	9	14	9	41
19	10	25	13	32	16	59	4	4	8	20	10	48
20	8	19	13	61	17	71	4	4	7	12	10	56
21	11	33	15	37	16	58	3	2	8	18	9	40
22	10	25	13	44	17	69	4	3	7	14	10	46
23	9	22	13	63	16	85	4	4	8	16	10	50
24	12	31	13	47	16	59	4	4	8	20	10	42
25	12	17	14	43	18	55	4	4	8	19	9	68
26	11	27	15	63	17	59	4	4	7	19	10	40
27	11	31	14	35	17	83	4	3	6	18	10	48
28	12	27	15	56	18	97	4	3	7	20	10	38
29	10	21	13	56	20	76	3	2	7	20	9	56
30	11	33	15	40	18	73	4	5	7	22	10	51
31	11	31	14	49	16	86	4	4	8	20	10	61
32	11	34	14	35	17	81	4	5	8	21	10	46
33	9	29	13	36	16	93	4	4	9	16	10	48
34	9	27	15	55	18	79	3	5	8	12	10	46
35	10	33	13	47	18	89	4	5	7	18	11	56
36	10	25	14	47	16	67	4	4	8	14	9	64
37	11	27	14	59	19	79	4	3	7	16	10	38
38	10	29	14	36	16	89	4	4	8	20	10	48
39	9	27	15	46	19	89	5	4	8	19	10	40
40	11	23	13	37	17	93	4	4	8	19	10	44
41	8	33	14	62	16	69	4	4	8	18	9	36
42	11	26	14	40	21	87	4	3	7	12	10	44
43	10	27	15	44	18	65	4	3	8	16	10	46
44	11	31	14	37	18	93	4	2	7	16	10	53
45	12	27	13	41	20	71	4	5	8	18	10	58
46	11	29	14	43	17	75	3	4	8	10	9	52
47	9	33	14	57	18	85	4	4	8	14	11	48
48	11	35	14	47	17	95	4	3	7	20	10	53
49	11	23	15	59	18	59
50	9	27	13	49	19	83
51	9	31	13	45	16	87
52	11	31	12	49	18	81
53	11	32	14	37	18	69
54	11	30	14	43	17	97
55	9	23	15	37	18	97
56	12	29	13	35	17	85
mean:	10.4	28.2	13.8	46.1	17.3	77.0	4.0	3.8	7.5	16.5	9.9	49.4
SD:	1.13	4.27	0.81	8.62	1.25	11.9	0.44	0.88	0.68	4.12	0.55	7.46
max:	12	40	15	63	21	97	5	5	9	28	11	68
min:	8	17	12	32	15	55	3	2	6	8	9	36
